# Supplementary material for: Recent thymic emigrants are tolerized in the absence of inflammation
Source: PubMed Central journal article supplement — J Exp Med. 2016 May 30;213(6):913–20. doi: 10.1084/jem.20151990 (PMC4886366; doi:10.1084/jem.20151990), 2016-05-30
Supplement: supp_jem.20151990_JEM_20151990_sm.pdf [file supp_jem.20151990_JEM_20151990_sm.pdf]

SUPPLEMENTAL MATERIAL

Friesen et al., <http://www.jem.org/cgi/content/full/jem.20151990/DC1>

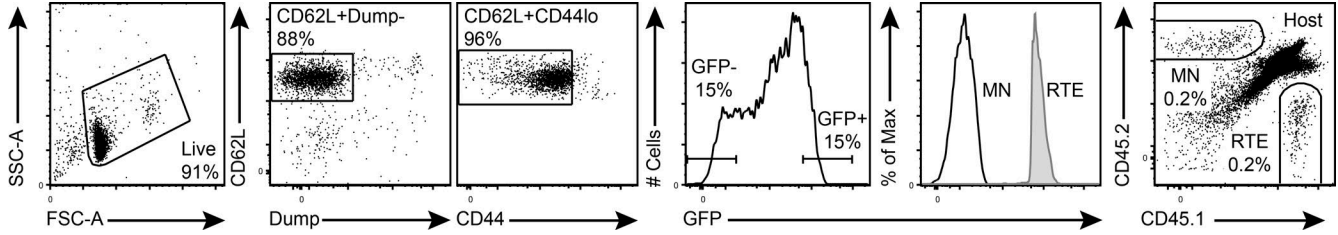

Figure S1. **RTE sorting strategy.** Sort gate strategy for the isolation of untouched RTEs and MN T cells (first four panels) and post-sort analysis (fifth panel) based on the adoptive transfer model of Kearney et al. (1994). 7 d after transfer, donor cell populations were easily distinguished from each other and from host cells in the pLNs of RIP-mOVA Tg recipients (far right panel). No proliferation or IL-2 or IFN- $\gamma$  production by OT-I or OT-II RTEs or mature T cells was seen in WT B6 recipients or in the iLNs of RIP-mOVA Tg hosts 7 d after transfer. FSC-A, forward scatter area; SSC-A, side scatter area.

REFERENCE

Kearney, E.R., K.A. Pape, D.Y. Loh, and M.K. Jenkins. 1994. Visualization of peptide-specific T cell immunity and peripheral tolerance induction in vivo. *Immunity*. 1:327–339. [http://dx.doi.org/10.1016/1074-7613\(94\)90084-1](http://dx.doi.org/10.1016/1074-7613(94)90084-1)
